# Supplementary material for: Exploring zebrafish larvae as a COVID-19 model: probable SARS-COV-2 replication in the swim bladder
Source: bioRxiv or medRxiv preprint supplement (doi:10.1101/2021.04.08.439059), 2021-10-10
Supplement: Supplementary file [file media-1.pdf]

# Exploring zebrafish larvae as a COVID-19 model: probable SARS-COV-2 replication in the swim bladder

Valerio Laghi, Veronica Rezelj, Laurent Boucontet, Pierre Boudinot, Irene Salinas, Georges Lutfalla, Marco Vignuzzi, Jean-Pierre Levrard

## Supplementary figures S1-4

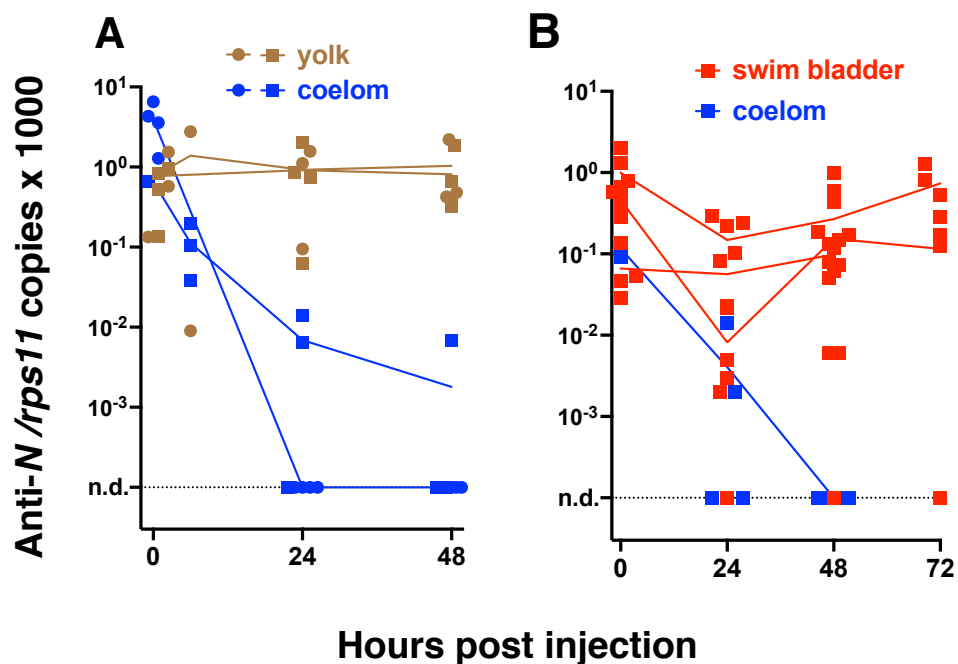

**Figure S1. Antisense viral transcripts in injected larvae.** qRT-PCR quantification of N viral transcripts with the leader sequence. Each point corresponds to an individual larva. Lines connect means in each independent experiment. Circles and squares correspond to injection of viral suspensions 1 and 2, as labelled on Table 1, respectively. n.d., not detected. A. 3 dpf larvae injected in the coelom (blue) or yolk (brown) B. 4 dpf larvae injected in the coelom (blue) or swim bladder (red).

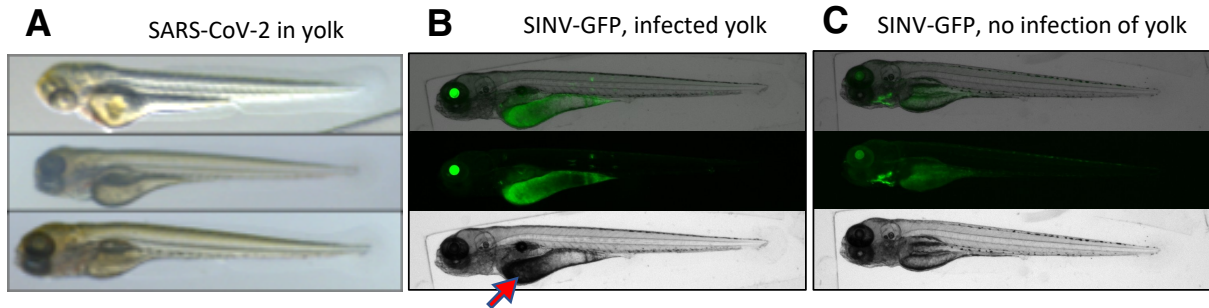

**Figure S2. Aspect of yolk-injected larvae.** A. transmitted light images of an individual larva injected with SARS-CoV-2 in the yolk just after injection (top), 24 (middle) and 48 hpi (bottom). B and C representative examples of SINV-infected larvae, 2 days after injection IV (B) and in the pericardium (C). GFP signal (middle), transmitted light image (bottom) and merged images (top). The GFP signal reveals localization of infection; red arrow points to the typical opacity of infected yolk.

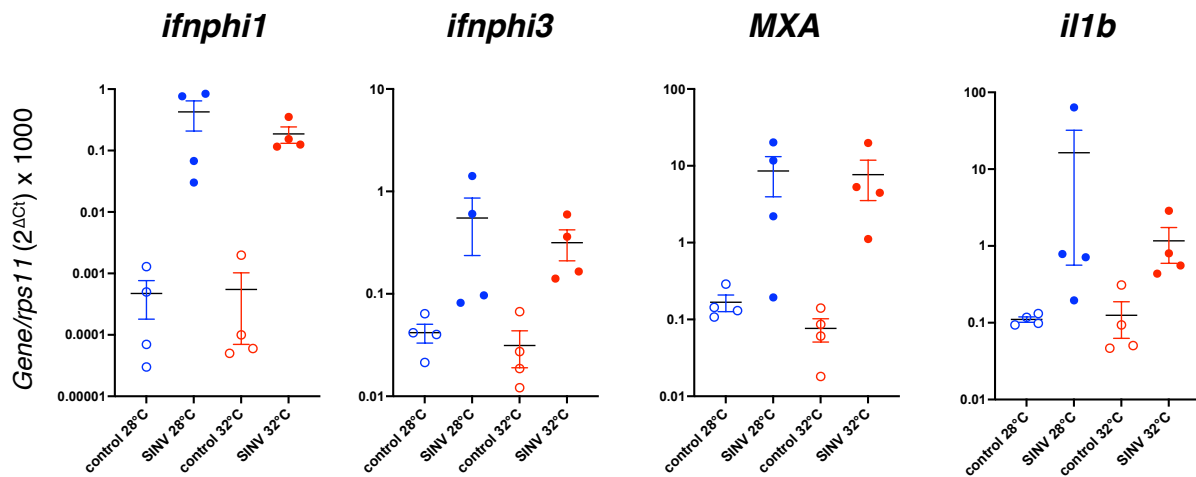

**Figure S3. Antiviral responses are inducible at 32°C.** qRT-PCR analysis of zebrafish larvae after 24 hours of incubation at either 28 (blue) or 32°C (red) following injection with 40 PFU of SINV-GFP.

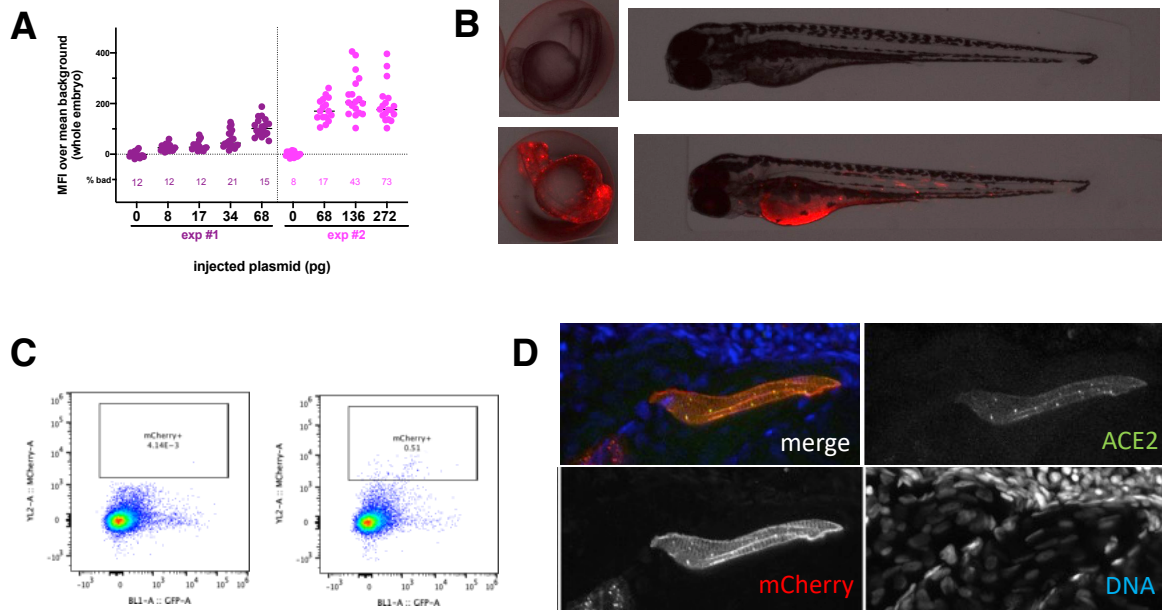

**Figure S4. Overexpression of hACE2-mCherry by plasmid injection at the 1-cell stage.** A. Optimization of the plasmid dose. Fluorescence intensity measured in 24hpf embryos after injection at the 1-cell stage of the specified amount of pz26hACE2-mCherryF plasmid together I-SceI, for the 25% embryos with best expression in each group. The percentage of misshapen embryos in each group is indicated on the bottom of the graph. B. representative image of a 24 hpf embryo (left) and of a 3 dpf larva (right) after mock injection (top) or injection of 68pg of pz26hACE2-mCherryF (bottom). C. Representative flow cytometry analysis of cells dissociated from 4dpf larvae, mock-injected (left) or injected with 68pg of pz26hACE2-mCherryF (right). D. Immunohistochemistry of a larva injected with 68pg of pz26hACE2-2A-mCherryF, showing ACE2 detection on a mCherry<sup>+</sup> muscle fiber.
